# Supplementary material for: Direct observation of the temperature-induced melting process of the Salmonella fourU RNA thermometer at base-pair resolution
Source: PubMed Central journal article supplement — Nucleic Acids Res. 2010 Mar 7;38(11):3834–47. doi: 10.1093/nar/gkq124 (PMC2887971; doi:10.1093/nar/gkq124), 2010-03-07
Supplement: gkq124_1.pdf [file gkq124_1.pdf]

# Supplementary material

## Direct observation of the temperature induced melting process of the *Salmonella* fourU RNA thermometer at base-pair resolution

*Jörg Rinnenthal<sup>1</sup>, Birgit Klinkert<sup>2</sup>, Franz Narberhaus<sup>2</sup> and Harald Schwalbe<sup>1\*</sup>*

<sup>1</sup>Institute for Organic Chemistry and Chemical Biology, Center for Biomolecular Magnetic Resonance, Johann Wolfgang Goethe-University, Max-von-Laue-Strasse 7, D-60438 Frankfurt/Main, Germany.

<sup>2</sup>Microbial Biology, Ruhr-Universität Bochum, Universitätsstrasse 150, NDEF06/783, 44780 Bochum, Germany.

**E-mail:** [schwalbe@nmr.uni-frankfurt.de](mailto:schwalbe@nmr.uni-frankfurt.de)

## MATERIALS AND METHODS

### Determination of mononucleotide imino proton exchange rates

In addition, imino exchange rates were measured on UTP and GTP. The composition of the UTP NMR-sample was 10 mM UTP, 15 mM  $K_xH_yPO_4$  (pH 6.5), 25 mM KCl, 90%  $H_2O$  and 10%  $D_2O$ . The GTP NMR-sample contained 10 mM GTP, 15 mM  $K_xH_yPO_4$  (pH 6.5), 25 mM KCl, 90%  $H_2O$  and 10%  $D_2O$ . Exchange rates were determined from the line widths of the imino signals in the  $^1H$ -1D spectra which were recorded at temperatures between 1°C-11°C. The line widths  $\Delta\nu$  were determined by deconvolution of the imino signal using the software Topspin 2.1 (Bruker). The exchange rates  $k_{ex}$  were calculated by  $k_{ex} = \Delta\nu \cdot \pi \cdot (R_2 - R_{2(B_0)})$ .  $R_2$  represents the spin-spin relaxation rate constant of the imino resonance whereas  $R_{2(B_0)}$  corresponds to line broadening caused by  $B_0$  field inhomogeneities. The contribution of  $R_2$  relaxation and  $R_{2(B_0)}$  were considered to be negligibly small in comparison to the contribution of  $k_{ex}$  to the imino line width.

### Theoretically derived temperature dependence of the NOE contributions

If one assumes no large structural changes of the RNA molecule upon heating, the temperature dependence of the factor 'd' in equation (14) (main manuscript) which reflects the NOE contributions of the magnetization transfer can be calculated. Structural changes of the RNA upon heating would be accompanied by large chemical shift changes upon changes in temperature. In addition, structural changes would also cause changes in the thermodynamic stabilities  $\Delta H_{diss}$ ,  $\Delta S_{diss}$  and  $\Delta G_{diss}$ . As a consequence, the three parameter equation (14) would not be sufficient to describe the temperature dependence of the imino proton exchange rates  $k_{ex}(T)$  anymore.

The NOE of a large biomacromolecule is proportional to the spectral density at zero frequency  $J(0)$ .  $J(0)$  is linearly proportional to the global rotational correlation time  $\tau_c$ .  $\tau_c$  is dependent on the temperature itself, the viscosity of the solvent and the global shape of the biomacromolecule. The temperature dependence of  $\tau_c$  can be described by equation (1)

$$\tau_c(T) = \frac{\kappa\eta}{k_B T} \quad (1)$$

T is the temperature,  $\eta$  is the viscosity,  $\kappa$  is the shape factor of the molecule and  $\tau_c$  is the rotational correlation time. In case of a spherical overall shape of the biomacromolecule the shape factor  $\kappa$  calculates to

$$\kappa = \frac{4}{3}\pi r^3 \quad (2)$$

The temperature dependence of  $\tau_c$  can be calculated by equation (3)

$$\frac{\tau_c(T_1)}{\tau_c(T_2)} = \frac{\eta(T_1)*T_2}{\eta(T_2)*T_1} \quad (3)$$

Notably, the shape factor  $\kappa$  is cancelled in equation (3). Thus, equation (3) is valid for arbitrary global shapes as long as the structure is insensitive to changes in temperature. We calculated the temperature dependence of 'd' according to equation (4) by using the  $\eta(T)$  values of water (taken from Handbook of Chemistry and Physics, CRC Press) (1). The resulting  $d(T)/d(283K)$  plot is given in Figure S1.

$$\frac{d(T)}{d(283K)} = \frac{\tau_c(T)}{\tau_c(283K)} = \frac{\eta(T)*283K}{\eta(283K)*T} \quad (4)$$

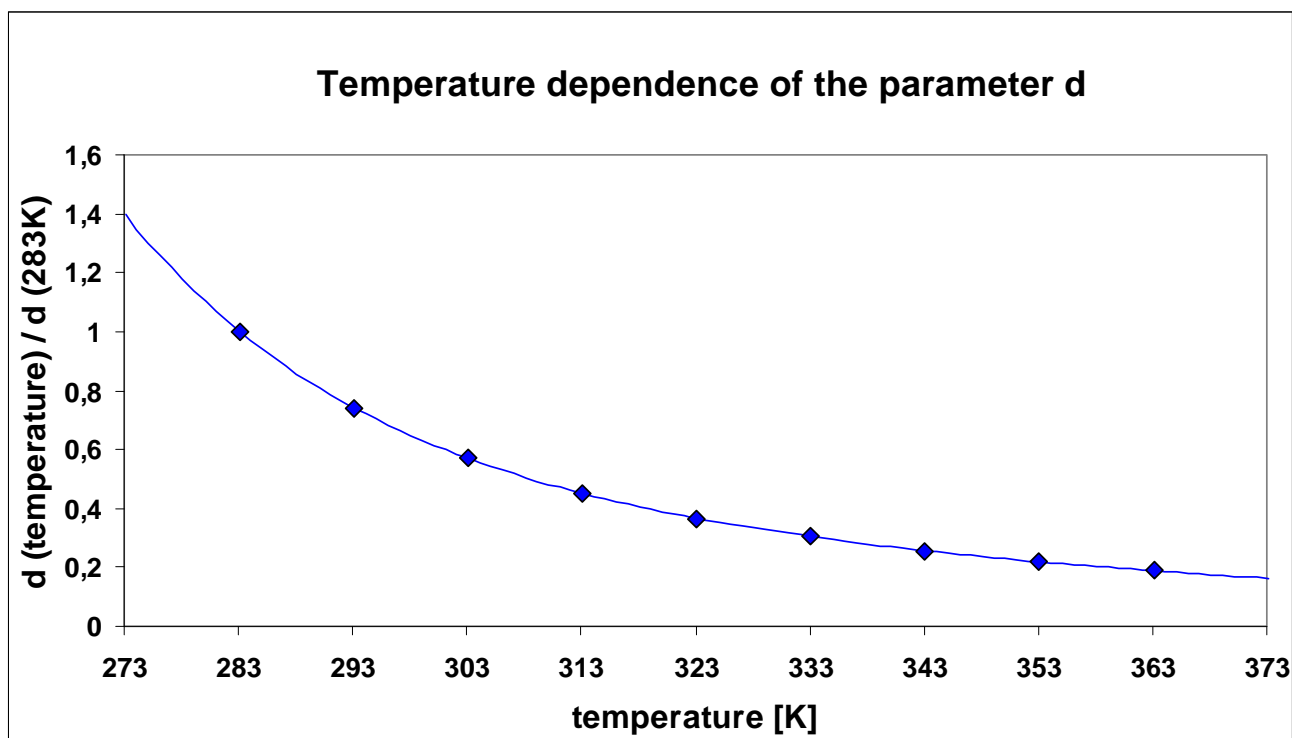

Figure S1: Temperature dependence of the NOE contributions  $d(T)/d(283K)$  to the  $k_{ex}$  rates determined by the inversion recovery method in aqueous solutions.

The  $d(T)/d(283K)$  function was fitted to a double exponential. Thus,  $d(T)$  can be described empirically by equation (5)

$$d(T) = d(283K) * [a * \exp(-b * (T - 273.1K)) + c * \exp(-f * (T - 273.1K))] \quad (5)$$

Parameters have to be set as follows:

$$a=0.8230; \quad b=0.0505 \quad c=0.5725 \quad f=0.0129$$

In most cases, it will be sufficient to use  $d$  as a temperature invariant parameter in equation (14) (main manuscript). However, there might be cases (other RNAs) in which the temperature dependence of  $d$

may become significant e.g. for larger RNA molecules that show stronger NOEs as a consequence of a longer rotational correlation time  $\tau_c$  or if the melting is less cooperative so that the observed temperature range becomes larger. In these cases equation (5) (main manuscript: equation (15)) can be used to incorporate the temperature dependence of  $d$  in equation (14) (main manuscript).

## **RESULTS**

### **NMR assignments**

The imino proton chemical shifts of the 4U-hp2-wt RNA and the 4U-hp2-A8C-mutant RNA are given in Table S1.

**Table S1:** Imino proton (N1:guanine; N3: uracil) chemical shifts of the 4U-hp2-wt and the 4U-hp2-A8C-mut RNA in NMR buffer recorded at 10°C. Chemical shifts were referenced to TSP

| Chemical shifts | <sup>1</sup> H | <sup>15</sup> N | <sup>1</sup> H | <sup>15</sup> N |
|-----------------|----------------|-----------------|----------------|-----------------|
|                 | 4U-hp2-wt      | 4U-hp2-wt       | 4U-hp2-A8C-mut | 4U-hp2-A8C-mut  |
| <b>G3</b>       | -              | -               | 10.074         | 141.757         |
| <b>U4</b>       | 14.139         | 162.441         | 14.121         | 162.454         |
| <b>U5</b>       | 13.258         | 162.855         | 13.243         | 162.723         |
| <b>G6</b>       | 9.781          | 141.354         | 9.853          | 141.714         |
| <b>U10</b>      | 14.070         | 161.981         | 13.641         | 161.568         |
| <b>U11</b>      | 11.749         | 157.634         | 11.698         | 157.774         |
| <b>U12</b>      | 12.086         | 158.092         | 11.998         | 158.101         |
| <b>U13</b>      | 13.431         | 162.029         | 13.398         | 162.026         |
| <b>G14</b>      | 11.626         | 145.834         | 11.616         | 145.900         |
| <b>U17</b>      | -              | -               | 13.352         | 161.144         |
| <b>U23</b>      | 13.909         | 162.313         | 13.861         | 162.280         |
| <b>U24</b>      | 13.845         | 162.931         | 13.799         | 162.920         |
| <b>G27/G28</b>  | 10.706         | 143.050         | 10.668         | 143.077         |
| <b>G30</b>      | 13.182         | 148.356         | 12.808         | 147.408         |
| <b>G31</b>      | -              | -               | 13.279         | 148.534         |
| <b>U32</b>      | -              | -               | 14.230         | 162.128         |
| <b>U33</b>      | 11.625         | 158.181         | 11.641         | 158.401         |
| <b>U36</b>      | -              | -               | 11.902         | 158.997         |

### Temperature dependent exchange rates of the open conformation

In order to determine the thermodynamic parameters  $\Delta G_{\text{TR}}$ ,  $\Delta H_{\text{TR}}$  and  $\Delta S_{\text{TR}}$ , the temperature dependences of the imino proton exchange rates of UTP (Figure S2A) and GTP NMR-samples were determined and analyzed using the Eyring formalism (Figure S2B) to extract the thermodynamic parameters of the transition state (TR) for the proton transition from the imino group to H<sub>2</sub>O according to the equations (3) and (4) (main article: Materials and Methods, Imino proton exchange rate analysis). Extracted values are given in the main article (Materials and Methods, Imino proton exchange rate analysis). Finally, the extracted  $\Delta G_{\text{TR}}$ ,  $\Delta H_{\text{TR}}$  and  $\Delta S_{\text{TR}}$  parameters were assumed to resemble the transition states of guanine and uracil nucleobases in the open conformation of an RNA molecule according to the energy diagram in Figure 1A (main article). Thus, these  $\Delta G_{\text{TR}}$ ,  $\Delta H_{\text{TR}}$  and  $\Delta S_{\text{TR}}$  values were used to calculate  $\Delta G_{\text{diss}}$ ,  $\Delta H_{\text{diss}}$  and  $\Delta S_{\text{diss}}$  for the individual base pair opening events according to equation (14) (main article: Materials and Methods, Imino proton exchange rate analysis).

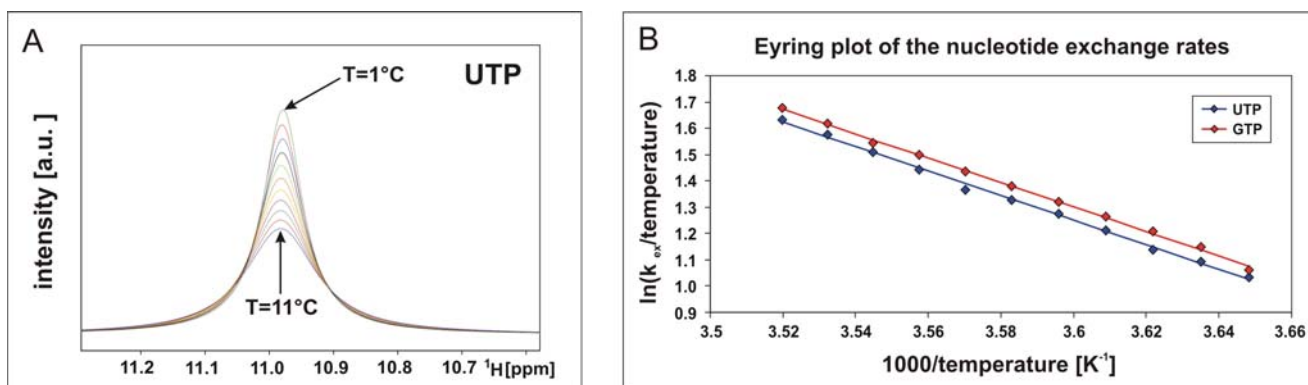

Figure S2: (A) Imino proton region of several  $^1\text{H}$ - $^1\text{D}$ -spectra recorded on a UTP sample at temperatures between 1-11°C. sample composition: 10 mM UTP, 15 mM  $\text{K}_x\text{H}_y\text{PO}_4$  (pH 6.5), 25 mM KCl, 90% H<sub>2</sub>O and 10% D<sub>2</sub>O (B) Eyring plot describing the temperature dependence of the imino proton exchange rates  $k_{\text{ex}}$  for UTP (blue) and GTP (red) in NMR-buffer (10 mM UTP, 15 mM  $\text{K}_x\text{H}_y\text{PO}_4$ , pH 6.5, 25 mM KCl, 90% H<sub>2</sub>O and 10% D<sub>2</sub>O).

### RNA preparation: native PAA gel electrophoresis

Native gel electrophoresis was used to verify that the purified RNA samples were folded into monomeric homogeneous conformations (Figure S3).

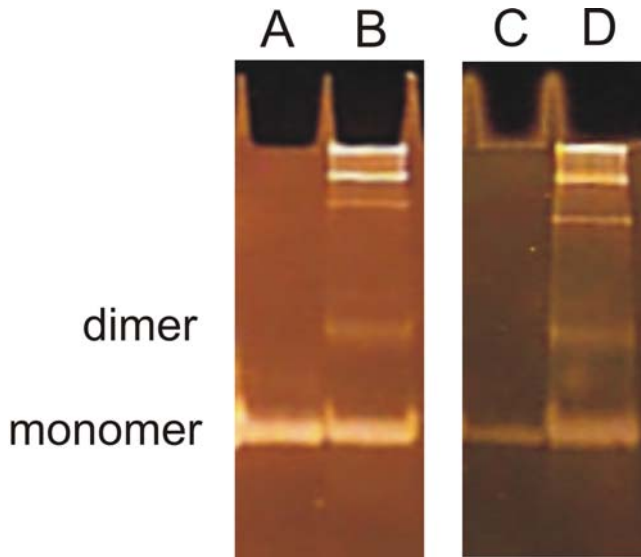

Figure S3: native 15% PAA gel electrophoresis (A) 4U-hp2-wt RNA refolded (B) 4U-hp2-wt RNA directly after T7 polymerase in vitro transcription (C) 4U-hp2-A8C-mutant RNA refolded (D) 4U-hp2-A8C-mutant RNA directly after T7 polymerase in vitro transcription



## Enthalpy-Entropy correlations (EEC)

The statistical significance of the EEC can be tested by the following inequality (2)

$$T_{hm} - 2\sigma < m < T_{hm} + 2\sigma \quad (1)$$

Where  $T_{hm}$  is the harmonic mean of the temperatures of the imino exchange rate measurements,  $m$  is the slope of the  $\Delta H_{diss}(\Delta S_{diss})$  correlation plot and  $\sigma$  is the standard deviation of  $m$  from the linear regression of the  $\Delta H_{diss}(\Delta S_{diss})$  correlation plot. If inequality (1) is fulfilled, the observed  $\Delta H_{diss}(\Delta S_{diss})$  correlation is not significant. For the wildtype RNA  $T_{hm}=295.06$  K and for the mutant RNA  $T_{hm}=297.44$  K. The slope is  $m=316$  K for the wildtype RNA and  $m=329.6$  K for the mutant RNA. The standard deviation  $\sigma$  is 2.1 K for the wildtype RNA and 1.5 K for the mutant RNA. Thus, we can write

$$290.86 \text{ K} < 299.26 \text{ K} < 316.0 \text{ K} = m \quad (4U\text{-hp2-wt RNA})$$

$$294.44 \text{ K} < 300.44 \text{ K} < 329.6 \text{ K} = m \quad (4U\text{-hp2-A8C-mutant RNA})$$

Since inequality (1) is not fulfilled in both cases, the observed  $\Delta H(\Delta S)$  correlations are clearly statistically significant.

## REFERENCES

1. (1974) *Handbook of Chemistry and Physics*. 55th ed. CRC PRESS.
2. Sharp, K. (2001) Entropy-enthalpy compensation: fact or artifact? *Protein Sci*, **10**, 661-667.
